# Supplementary material for: Tauroursodeoxycholic bile acid arrests axonal degeneration by inhibiting the unfolded protein response in X-linked adrenoleukodystrophy
Source: PubMed Central journal article supplement (PMC5250669; doi:10.1007/s00401-016-1655-9), 2016-12-21

Figure S1

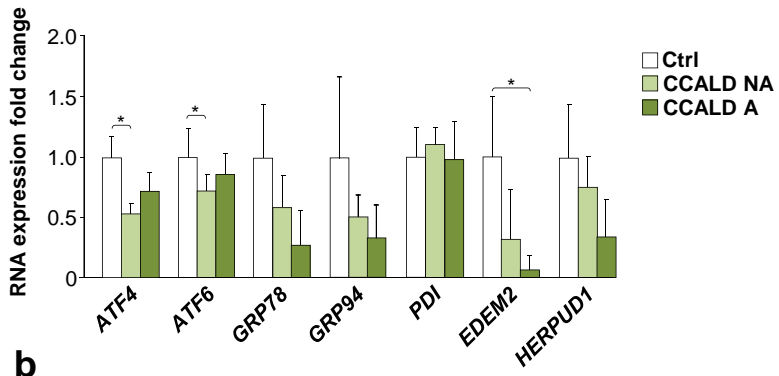

**b**

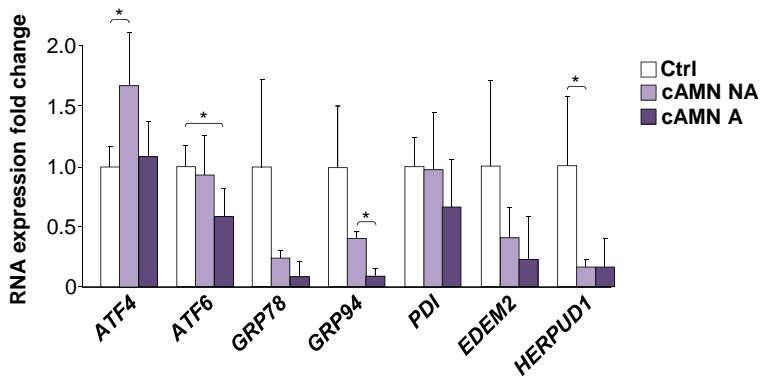

Supplement: 401_2016_1655_MOESM2_ESM.pdf [file 401_2016_1655_MOESM2_ESM.pdf]
