# Supplementary material for: Tauroursodeoxycholic bile acid arrests axonal degeneration by inhibiting the unfolded protein response in X-linked adrenoleukodystrophy
Source: PubMed Central journal article supplement (PMC5250669; doi:10.1007/s00401-016-1655-9), 2016-12-21
Supplement: 401_2016_1655_MOESM8_ESM.pdf [file 401_2016_1655_MOESM8_ESM.pdf]

Table S1

| <b>PHENOTYPE</b> | <b>Sex</b> | <b>AGE</b> | <b>BRAIN WHITE MATTER AREA</b> | <b>Post Mortem Interval (hours)</b> |
|------------------|------------|------------|--------------------------------|-------------------------------------|
| Control          | Male       | 7          | Prefrontal cortex              | 12                                  |
| Control          | Male       | 8          | Dorsolateral prefrontal cortex | 5                                   |
| Control          | Male       | 11         | Dorsolateral prefrontal cortex | 16                                  |
| Control          | Male       | 12         | Dorsolateral prefrontal cortex | 13                                  |
| Control          | Male       | 13         | Prefrontal cortex              | 5                                   |
| Control          | Male       | 36         | Dorsolateral prefrontal cortex | 18                                  |
| Control          | Male       | 37         | Dorsolateral prefrontal cortex | 11                                  |
| Control          | Male       | 37         | Dorsolateral prefrontal cortex | 12                                  |
| Control          | Male       | 37         | Dorsolateral prefrontal cortex | 9                                   |
| Control          | Male       | 39         | Dorsolateral prefrontal cortex | 14                                  |
| CCALD            | Male       | 9          | Dorsolateral prefrontal cortex | 15                                  |
| CCALD            | Male       | 10         | Frontopolar prefrontal cortex  | 1                                   |
| CCALD            | Male       | 13         | Frontopolar prefrontal cortex  | 14                                  |
| CCALD            | Male       | 6          | Frontopolar prefrontal cortex  | 12                                  |
| CCALD            | Male       | 8          | Frontopolar prefrontal cortex  | 1                                   |
| cAMN             | Male       | 36         | Frontopolar prefrontal cortex  | 2                                   |
| cAMN             | Male       | 33         | Dorsolateral prefrontal cortex | 6                                   |
| cAMN             | Male       | 44         | Frontopolar prefrontal cortex  | 8                                   |
| cAMN             | Male       | 27         | Frontopolar prefrontal cortex  | 11                                  |
| cAMN             | Male       | 39         | Frontopolar prefrontal cortex  | 7                                   |
