# Supplementary material for: Tauroursodeoxycholic bile acid arrests axonal degeneration by inhibiting the unfolded protein response in X-linked adrenoleukodystrophy
Source: PubMed Central journal article supplement (PMC5250669; doi:10.1007/s00401-016-1655-9), 2016-12-21
Supplement: 401_2016_1655_MOESM9_ESM.pdf [file 401_2016_1655_MOESM9_ESM.pdf]

Table S2

| Identification | Sex  | Genotype | Phenotype |
|----------------|------|----------|-----------|
| X-ALD-1        | Male | X-ALD    | AMN       |
| X-ALD-2        | Male | X-ALD    | AMN       |
| X-ALD-3        | Male | X-ALD    | AMN       |
| X-ALD-4        | Male | X-ALD    | AMN       |
| CTL-1          | Male |          | CTL       |
| CTL-2          | Male |          | CTL       |
| CTL-3          | Male |          | CTL       |
| CTL-4          | Male |          | CTL       |
