# Supplementary material for: Tauroursodeoxycholic bile acid arrests axonal degeneration by inhibiting the unfolded protein response in X-linked adrenoleukodystrophy
Source: PubMed Central journal article supplement (PMC5250669; doi:10.1007/s00401-016-1655-9), 2016-12-21
Supplement: 401_2016_1655_MOESM10_ESM.pdf [file 401_2016_1655_MOESM10_ESM.pdf]

Table S3

| <b>SCORE</b> | <b>PHENOTYPE</b>                                                                                                  |
|--------------|-------------------------------------------------------------------------------------------------------------------|
| <b>0</b>     | Paralysis of the hindlimbs                                                                                        |
| <b>0.5</b>   | Both hindlimbs are entirely retracted and touching the abdomen during 100% of the time suspended                  |
| <b>0.75</b>  | Both hindlimbs are entirely retracted toward the abdomen during 100% of the time suspended                        |
| <b>1</b>     | Both hindlimbs are partially retracted toward the abdomen during 100% of the time suspended                       |
| <b>1.25</b>  | alternating clasping and flexion of hindlimbs, although clasping occurs for more than 50% of the time suspended   |
| <b>1.5</b>   | Alternating clasping and flexion, equally occurring during 100% of the time suspended                             |
| <b>1.75</b>  | Alternating clasping and flexion of hindlimbs, although flexion occurs for more than 50% of the time suspended    |
| <b>2</b>     | Flexion of hindlimbs during 100% of the time suspended                                                            |
| <b>2.25</b>  | Alternating flexion and extension of hindlimbs, although flexion occurs for more than 50% of the time suspended   |
| <b>2.5</b>   | Alternating flexion and extension, equally occurring during 100% of the time suspended                            |
| <b>2.75</b>  | Alternating flexion and extension of hindlimbs, although extension occurs for more than 50% of the time suspended |
| <b>3</b>     | Extension of hindlimbs in an angle $<90^\circ$ during 100% of the time suspended                                  |
| <b>3.5</b>   | Alternating extension of hindlimbs in an angle $<90^\circ$ and $\geq 90^\circ$ during 100% of the time suspended  |
