# Supplementary material for: Tauroursodeoxycholic bile acid arrests axonal degeneration by inhibiting the unfolded protein response in X-linked adrenoleukodystrophy
Source: PubMed Central journal article supplement (PMC5250669; doi:10.1007/s00401-016-1655-9), 2016-12-21
Supplement: 401_2016_1655_MOESM11_ESM.pdf [file 401_2016_1655_MOESM11_ESM.pdf]

Table S4

| <b>Antibody</b>                                  | <b>supplier</b>           | <b>product number</b> | <b>host</b> | <b>clonality</b> | <b>working dilution</b> |
|--------------------------------------------------|---------------------------|-----------------------|-------------|------------------|-------------------------|
| Aldolase A                                       | Novus biologicals         | NB600-915             | goat        | polyclonal       | 1/1000                  |
| APP                                              | Serotec                   | AHP538                | rabbit      | polyclonal       | 1/400                   |
| ATF4 (D4B8)                                      | Cell signaling technology | 11815                 | rabbit      | monoclonal       | 1/500                   |
| ATF6                                             | Prosci-inc                | 3683                  | mouse       | monoclonal       | 1/1000                  |
| eIF2 $\alpha$                                    | Cell signaling technology | 9722                  | rabbit      | polyclonal       | 1/1000                  |
| GADD153/CHOP                                     | Santa-cruz                | sc-793                | rabbit      | polyclonal       | 1/1000                  |
| GADD34                                           | Santa-cruz                | sc-8327               | rabbit      | polyclonal       | 1/1000                  |
| GFAP                                             | Sigma                     | G3893                 | mouse       | monoclonal       | 1/400                   |
| GRP78                                            | Sigma                     | G8918                 | rabbit      | polyclonal       | 1/1000                  |
| GRP94                                            | Abcam                     | ab63469               | mouse       | monoclonal       | 1/1000                  |
| Iba1                                             | Wako                      | 019-19741             | rabbit      | polyclonal       | 1/1000                  |
| IRE1 $\alpha$                                    | Novus biologicals         | NB100-2323            | rabbit      | polyclonal       | 1/1000                  |
| PARP1                                            | Calbiochem                | AM30                  | mouse       | monoclonal       | 1/1000                  |
| PDI (RL90)                                       | Abcam                     | ab2792                | mouse       | monoclonal       | 1/1000                  |
| P-eIF2 $\alpha$                                  | Cell signaling technology | 3398                  | rabbit      | monoclonal       | 1/500                   |
| PERK                                             | Cell signaling technology | 3192                  | rabbit      | monoclonal       | 1/1000                  |
| P-PERK                                           | Santa-cruz                | sc-32577              | rabbit      | polyclonal       | 1/500                   |
| Synaptophysin                                    | DakoCytomation            | M0776                 | mouse       | monoclonal       | 1/400                   |
| $\gamma$ -tubulin                                | Sigma                     | T6557                 | mouse       | monoclonal       | 1/2000                  |
| Anti-mouse Alexa fluor-488                       | Invitrogen                | A-11001               | goat        | polyclonal       | 1/1000                  |
| Anti-mouse IgG linked to horseradish peroxidase  | Dako Cytomation           | P0447                 | goat        | polyclonal       | 1/5000-1/10000          |
| Anti-rabbit Alexa fluor-555                      | Invitrogen                | A-21428               | goat        | polyclonal       | 1/1000                  |
| Anti-rabbit IgG linked to horseradish peroxidase | Dako Cytomation           | P0448                 | goat        | polyclonal       | 1/5000-1/10000          |
