# Supplementary material for: Tauroursodeoxycholic bile acid arrests axonal degeneration by inhibiting the unfolded protein response in X-linked adrenoleukodystrophy
Source: PubMed Central journal article supplement (PMC5250669; doi:10.1007/s00401-016-1655-9), 2016-12-21
Supplement: 401_2016_1655_MOESM12_ESM.pdf [file 401_2016_1655_MOESM12_ESM.pdf]

Table S5

|             | WT | <i>Abcd1</i> <sup>-</sup> / <i>Abcd2</i> <sup>-</sup> | <i>Abcd1</i> <sup>-</sup> / <i>Abcd2</i> <sup>-</sup> + TUDCA |
|-------------|----|-------------------------------------------------------|---------------------------------------------------------------|
| Iba1        | *  | ***                                                   | *                                                             |
| GFAP        | *  | ***                                                   | *                                                             |
| Sudan Black | *  | ***                                                   | *                                                             |
